# Supplementary material
Source: Springer Nature journal article supplement (https://www.springermedizin.de/resource/supplementary/12885_2008_1161_MOESM2_ESM.pdf/9471274)

**A** No cells added  
Matrigel-coated transwell

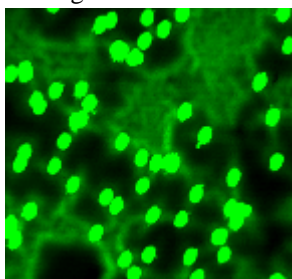

**B** CTRL GM6001

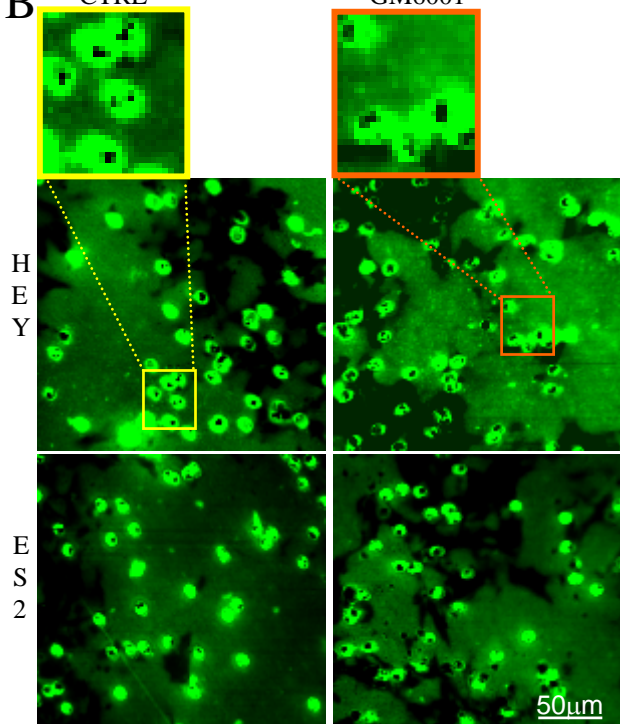

**C**

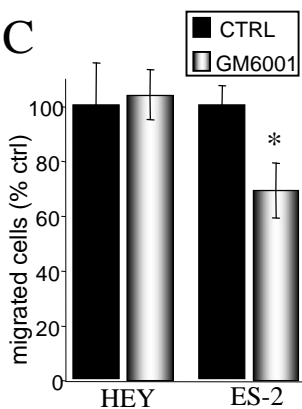

Supplement: MOESM2 [file 9471274]
